# Supplementary material for: Perfect seed pairing is not a generally reliable predictor for miRNA-target interactions
Source: Springer Nature journal article supplement (doi:10.1038/nsmb1138), 2006-08-20
Supplement: 41594_2006_BFnsmb1138_MOESM1_ESM.pdf [file 41594_2006_BFnsmb1138_MOESM1_ESM.pdf]

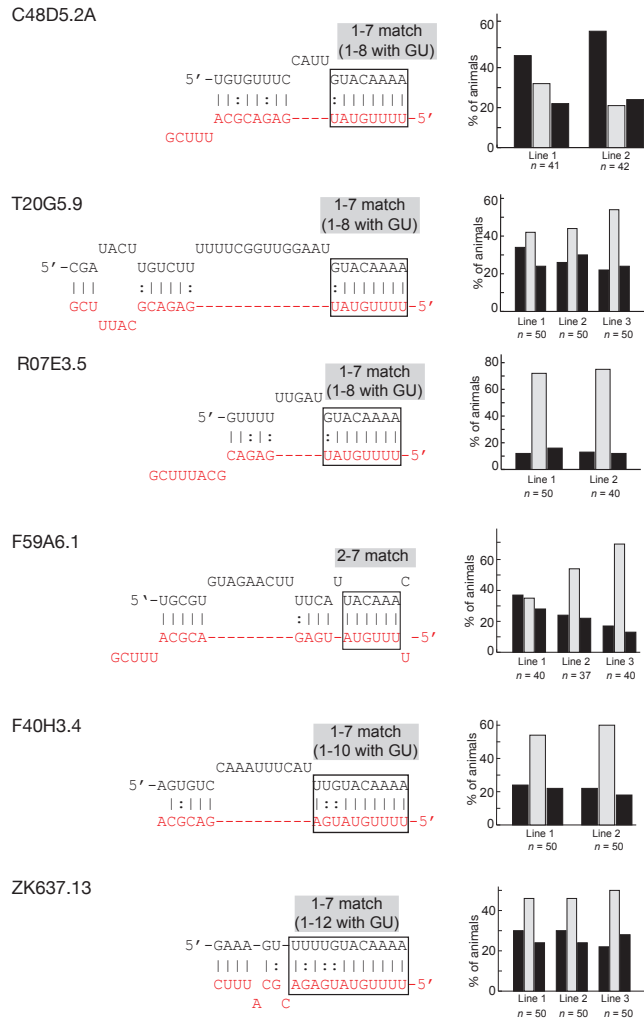

**Supplementary Figure 1: *Isy-6*-responsiveness of predicted *Isy-6* target 3'UTRs.**  
See legend to Figure 2b for explanations on data presentation.
