# Supplementary material for: Perfect seed pairing is not a generally reliable predictor for miRNA-target interactions
Source: Springer Nature journal article supplement (doi:10.1038/nsmb1138), 2006-08-20
Supplement: 41594_2006_BFnsmb1138_MOESM2_ESM.pdf [file 41594_2006_BFnsmb1138_MOESM2_ESM.pdf]

| <i>C. briggsae</i> ortholog of the following <i>C.elegans</i> genes: | 3'UTR Complementarity with <i>C. briggsae</i> <i>Isy-6</i> (red)                                                 | distance from stop codon in <i>C.briggsae</i> ( <i>C.elegans</i> ) |
|----------------------------------------------------------------------|------------------------------------------------------------------------------------------------------------------|--------------------------------------------------------------------|
| <i>cog-1</i>                                                         | <pre> 5'          AC 5'-AAU-CGUC UUAUACAAAA           :        UUA GCAG--AGUAUGUUUU-5' GCC  C </pre>             | 294 bp<br>(283 bp)                                                 |
| C27H6.3                                                              | <pre> UUU          UAAAAUUUUUAU 5'- CGGA --UCUU UACAAAA          :      GCCU AGAG -----AUGUUUU-5' UACGC U </pre> | 48 bp<br>(159 bp)                                                  |
| F40H3.4                                                              | <pre> AA A 5'-UGU CU GUACAAAA   :   : :      ACG GA UAUGUUUU-5' GCCUU CA G </pre>                                | 122 bp<br>(68 bp)                                                  |
| F55G1.12                                                             | <pre> GCUUGUAAAGUU 5'-UGCGUUUU AUACAAAA     : : :  ACGCAGAG-----UAUGUUUU-5' GCCUU </pre>                         | 79 bp<br>(84 bp)                                                   |
| C02B8.4                                                              | <pre> A AAAAA A 5'- AAUG GUCU CAUAUAA              :  UUAC ---CAGA-GUAUGUU -5' GCC G U </pre>                    | 165 bp<br>(275 bp)                                                 |
| T05C12.8                                                             | <pre> A AA A C 5'- G UC AUACAAA             C AG-UAUGUUU -5' GCCUUACG AG U </pre>                                | 66 bp<br>(57 bp)                                                   |
| C48D5.2a                                                             | <pre> CGAA AA A 5'- GGA G UC AUACAAAA                  CCU C AG-UAUGUUUU-5' G UACG AG </pre>                     | 406 bp<br>(423 bp)                                                 |
| F59A6.1                                                              | <pre> AUUCC UUUCUGA 5'-UGUG UCUU AUACAAA   :     :         ACGC AGAG-----UAUGUUU -5' GCCUU U </pre>              | 115 bp<br>(323 bp)                                                 |
| ZK637.13                                                             | <pre> 5'-UUUUGUACAAAA  : :        AGAGUAUGUUUU-5' GCCUUACGC </pre>                                               | 124 bp<br>(91 bp)                                                  |
| T14G12.2                                                             | <pre> AA UCACAGUA 5'-GAAU UGUUUCA UACAAAA      : :            CUUA -GCAGAGU-----AUGUUUU-5' GC C </pre>           | 166 bp<br>(155 bp)                                                 |
| T20G5.9                                                              | <pre> A 5'-GAUGC GU---GUACAAAA :       :        UUACG-CA UAUGUUUU-5' GCC GAG </pre>                              | 192 bp<br>(140 bp)                                                 |
| R07E3.5                                                              | <pre> 5'-UUUUGUACAAAA  : :        AGAGUAUGUUUU-5' GCCUUACGC </pre>                                               | 65 bp<br>(36 bp)                                                   |
| T04C9.2                                                              | <pre> C 5'-GC-UC UAUACAAA              CG AG GUAUGUUU -5' GCCUUA C A U </pre>                                    | 30 bp<br>(30 bp)                                                   |

**Supplementary Figure 2: Conservation of seed matches to *Isy-6* from *C. elegans* to *C. briggsae*.** The pairing of the 3'UTRs of the *C.briggsae* orthologs of the genes shown in Fig.2B to *C.briggsae* *Isy-6* is shown. The conservation of the seed matches may indicate that the seed matches are important in some context, but as we show in this report, they are clearly not a sufficient predictor of a functional *Isy-6* interaction.
