# Supplementary material for: Perfect seed pairing is not a generally reliable predictor for miRNA-target interactions
Source: Springer Nature journal article supplement (doi:10.1038/nsmb1138), 2006-08-20
Supplement: 41594_2006_BFnsmb1138_MOESM3_ESM.pdf [file 41594_2006_BFnsmb1138_MOESM3_ESM.pdf]

**Supplementary Table 1: List of primers and transgenic arrays generated in this study.**

| DNA constructs                                                                           | Primer sequence                                                                                                                                                          | Transgenic array                                                            |
|------------------------------------------------------------------------------------------|--------------------------------------------------------------------------------------------------------------------------------------------------------------------------|-----------------------------------------------------------------------------|
| <i>ceh-36<sup>prom</sup>::gfp::cog-1</i>                                                 | 5'-tttgaattcctttaagcgtttacacct;<br>3'-tttcggccgtaataatctaaatgatg                                                                                                         | <i>otEx2647; otEx2648;</i><br><i>otEx2649</i>                               |
| <i>ceh-36<sup>prom</sup>::gfp::cog-1</i><br>seed point mutation C to<br>A in position #5 | 5'-ccaaatcatcgtcactataaaaaaaccaactcctttacc<br>3'-ggtaaaaggagtttggtttttataagtgacgatgattgg<br>Outside primers same as for <i>ceh-36<sup>prom</sup>::gfp::cog-1</i>         | <i>otEx2653; otEx2654</i>                                                   |
| <i>ceh-36<sup>prom</sup>::gfp::cog-1</i><br>mutated seed only                            | 5'-gccatttttttttttaaaaaatacaaaaaaaccaactccc<br>3'-gggagtttggtttgtatttttaaaagaaaaaaatggc<br>Outside primers same as for <i>ceh-36<sup>prom</sup>::gfp::cog-1</i>          | <i>otEx2655; otEx2656;</i><br><i>otEx2657</i>                               |
| <i>ceh-36<sup>prom</sup>::gfp::unc-54</i>                                                | 5'-tttgaattctgccaattactctcaacatccc;<br>3'-tttcggccgaaacagttatggttggatattggg                                                                                              | <i>otEx2645; otEx2646</i>                                                   |
| <i>ceh-36<sup>prom</sup>::gfp::lin-28</i>                                                | 5'-tttgaattcctcaaatagatttctctcgt;<br>3'-tttcggccgcaaaactctcgatttatttcagcg                                                                                                | <i>otEx2658; otEx2659;</i>                                                  |
| <i>ceh-36<sup>prom</sup>::gfp::unc-54 +</i><br><i>lisy-6 site</i>                        | 5'-ccaaatcatcgtcactatacaaaattcttcgcacgtctggcc;<br>3'-aagaaataaaaattgctggtttgtataagtgacgatgattgg<br>Outside primers same as for <i>ceh-36<sup>prom</sup>::gfp::unc-54</i> | <i>otEx2650; otEx2651;</i><br><i>otEx2652</i>                               |
| <i>ceh-36<sup>prom</sup>::gfp::lin-28 +</i><br><i>lisy-6 site</i>                        | 5'-ccaaatcatcgtcactatacaaaactcaaatgactctcaggg;<br>3'-tttgataagtgacgatgattgtagagggaattgagtaaaac<br>Outside primers same as for <i>ceh-36<sup>prom</sup>::gfp::lin-28</i>  | <i>otEx2660; otEx2661;</i><br><i>otEx2662</i>                               |
| <i>ceh-36<sup>prom</sup>::gfp::cog-1 G:U</i><br>in position #2                           | 5'-ccaaatcatcgtcactatacaaga<br>3'-tctgtataagtgacgatgattgg<br>Outside primers same as for <i>ceh-36<sup>prom</sup>::gfp::cog-1</i>                                        | <i>otEx2666; otEx2667;</i><br><i>otEx2668</i>                               |
| <i>ceh-36<sup>prom</sup>::gfp::cog-1 G:U</i><br>in position #3                           | 5'-ccaaatcatcgtcactatacaaga;<br>3'-ttctgataagtgacgatgattgg<br>Outside primers same as for <i>ceh-36<sup>prom</sup>::gfp::cog-1</i>                                       | <i>otEx2669; otEx2670;</i><br><i>otEx2671; otEx2672;</i><br><i>otEx2673</i> |
| <i>ceh-36<sup>prom</sup>::gfp::cog-1 G:U</i><br>in position #4                           | 5'-ccaaatcatcgtcactatacaaga;<br>3'-tttcgataagtgacgatgattgg<br>Outside primers same as for <i>ceh-36<sup>prom</sup>::gfp::cog-1</i>                                       | <i>otEx2674; otEx2675;</i>                                                  |
| <i>ceh-36<sup>prom</sup>::gfp::cog-1 G:U</i><br>in position #6                           | 5'-ccaaatcatcgtcactatgcaaaa;<br>3'-tttgataagtgacgatgattgg<br>Outside primers same as for <i>ceh-36<sup>prom</sup>::gfp::cog-1</i>                                        | <i>otEx2676; otEx2677;</i><br><i>otEx2678</i>                               |
| <i>ceh-36<sup>prom</sup>::gfp::cog-1 G:U</i><br>in position #8                           | 5'-ccaaatcatcgtcactatgcaaaa;<br>3'-tttgataagtgacgatgattgg<br>Outside primers same as for <i>ceh-36<sup>prom</sup>::gfp::cog-1</i>                                        | <i>otEx2679; otEx2680</i>                                                   |
| <i>ceh-36<sup>prom</sup>::gfp::cog-1 G:U</i><br>in position #6 and #8                    | 5'-ccaaatcatcgtcactatgcaaaaaccaaactccc<br>3'-gggagtttggttttgcaaaagtgacgatgattgg<br>Outside primers same as for <i>ceh-36<sup>prom</sup>::gfp::cog-1</i>                  | <i>otEx2765; otEx2766</i>                                                   |
| <i>ceh-36<sup>prom</sup>::gfp::cog-1 G:U</i><br>in position #2 and #6                    | 5'-ccaaatcatcgtcactatgcaaaagaccaaactccc<br>3'-gggagtttggttttgcaaaagtgacgatgattgg<br>Outside primers same as for <i>ceh-36<sup>prom</sup>::gfp::cog-1</i>                 | <i>otEx2767; otEx2768;</i><br><i>otEx2769</i>                               |
| <i>ceh-36<sup>prom</sup>::gfp::C02B8.4</i>                                               | 5'-tttgaattcttgaataatggaaaaaactggcc;<br>3'-tttcggccgatttggctccgatggcc                                                                                                    | <i>otEx2681; otEx2682;</i><br><i>otEx2683</i>                               |
| <i>ceh-36<sup>prom</sup>::gfp::F55G1.12</i>                                              | 5'-tttgaattcattgattttatttttaatttaagt;<br>3'-tttcggccgatcatttaactcactattttg                                                                                               | <i>otEx2684; otEx2685;</i><br><i>otEx2686</i>                               |
| <i>ceh-36<sup>prom</sup>::gfp::C48D5.2A</i>                                              | 5'-tttgaattcgtttttcaaaaaataca;<br>3'-aaacggccgggggaaatgataaaaat                                                                                                          | <i>otEx2687; otEx2688</i>                                                   |
| <i>ceh-36<sup>prom</sup>::gfp::F59A6.1</i>                                               | 5'-tttgaattctttctgtagtttctctgt;<br>3'-aaacggccgtaattggccatgagattgtg                                                                                                      | <i>otEx2689; otEx2690;</i><br><i>otEx2691</i>                               |
| <i>ceh-36<sup>prom</sup>::gfp::F40H3.4</i>                                               | 5'-tttgaattcattgtaataactaaaggctc;<br>3'-tttcggccgtgtaattttacgaaaaatgaatatg                                                                                               | <i>otEx2692; otEx2693</i>                                                   |
| <i>ceh-36<sup>prom</sup>::gfp::T05C12.8</i>                                              | 5'-tttgaattctacaactaaatgtggcaaacg;<br>3'-tttcggccgatttcccgtttaccctgtt                                                                                                    | <i>otEx2694; otEx2695;</i><br><i>otEx2696</i>                               |
| <i>ceh-36<sup>prom</sup>::gfp::C27H6.3</i>                                               | 5'-tttgaattcttgaaaaatgtgatgttttc;<br>3'-tttcggccgatctatcatgtttcgatactttg                                                                                                 | <i>otEx2697; otEx2698;</i><br><i>otEx2699</i>                               |
| <i>ceh-36<sup>prom</sup>::gfp::T23E1.1</i>                                               | 5'-tttgaattcaaatgagatcaaatgttc;<br>3'-tttcggccgaaaaaatgaagagcgtgtgtttgta                                                                                                 | <i>otEx2700; otEx2701</i>                                                   |
| <i>ceh-36<sup>prom</sup>::gfp::T14G12.2</i>                                              | 5'-tttgaattcctcacaaaaagtgtggtgcg;<br>3'-tttcggccgacgcaaaagcagatgtgaca                                                                                                    | <i>otEx2702; otEx2703;</i><br><i>otEx2704</i>                               |
| <i>ceh-36<sup>prom</sup>::gfp::ZK637.13</i>                                              | 5'-tttgaattcttgaccctttatattgtatttgaatga;<br>3'-tttcggccgctttgtttttgtacaaaaacgtttcc                                                                                       | <i>otEx2717; otEx2718;</i><br><i>otEx2719</i>                               |
| <i>ceh-36<sup>prom</sup>::gfp::T20G5.9</i>                                               | 5'-tttgaattcgcaacgattaaatagattctacc;<br>3'-tttcggccgtcaattcgtgattctgtg                                                                                                   | <i>otEx2720; otEx2721;</i><br><i>otEx2722</i>                               |
| <i>ceh-36<sup>prom</sup>::gfp::R07E3.5</i>                                               | 5'-tttgaattcagttttgatgtacaaaaactagcc;<br>3'-tttcggccgtttggcaaatggaaccgttcaaacg                                                                                           | <i>otEx2723; otEx2724;</i>                                                  |
| <i>ceh-36<sup>prom</sup>::gfp::T04C9.2</i>                                               | 5'-tttgaattccgcaataactttgttcggc;<br>3'-tttcggccgcacacaatgtctaatcgtgccc                                                                                                   | <i>otEx2725; otEx2726;</i><br><i>otEx2727</i>                               |
